# Supplementary material for: Electronic medical record-related burnout in healthcare providers: a scoping review of outcomes and interventions
Source: HighWire-hosted journal article supplement (doi:10.1136/bmjopen-2022-060865), 2022-08-01
Supplement: bmjopen-2022-060865supp001_data_supplement.pdf [file bmjopen-2022-060865supp001_data_supplement.pdf]

## Supplementary File 1: Search strategy

*MEDLINE*

| #  | <i>Query</i>                                                                           | <i>Results from 30 Jul 2021</i> |
|----|----------------------------------------------------------------------------------------|---------------------------------|
| 1  | <i>Physicians, Primary Care/ or Physicians, Family/ or Physicians/</i>                 | 113,196                         |
| 2  | <i>physician*.mp.</i>                                                                  | 597,903                         |
| 3  | <i>doctor*.mp.</i>                                                                     | 136,508                         |
| 4  | <i>General Practitioners/</i>                                                          | 8,682                           |
| 5  | <i>general practitioner*.mp.</i>                                                       | 55,196                          |
| 6  | <i>Nurses/</i>                                                                         | 41,020                          |
| 7  | <i>nurse*.mp.</i>                                                                      | 375,843                         |
| 8  | <i>Nursing Staff, Hospital/ or Nursing Staff/ or Nursing/ or Primary Care Nursing/</i> | 118,987                         |
| 9  | <i>Nurse Practitioners/</i>                                                            | 18,049                          |
| 10 | <i>nurse practitioner*.mp.</i>                                                         | 23,743                          |
| 11 | <i>registered nurse*.mp.</i>                                                           | 12,681                          |
| 12 | <i>1 or 2 or 3 or 4 or 5 or 6 or 7 or 8 or 9 or 10 or 11</i>                           | 1,106,793                       |
| 13 | <i>Electronic Health Records/</i>                                                      | 22,614                          |
| 14 | <i>Medical Records Systems, Computerized/ or Medical Records/</i>                      | 84,470                          |
| 15 | <i>Electronic medical record*.mp.</i>                                                  | 19,890                          |
| 16 | <i>electronic patient record*.mp.</i>                                                  | 2,318                           |
| 17 | <i>13 or 14 or 15 or 16</i>                                                            | 121,298                         |
| 18 | <i>Burnout, Psychological/</i>                                                         | 854                             |

|    |                                                                                                  |        |
|----|--------------------------------------------------------------------------------------------------|--------|
| 19 | <i>((psychological load* or strain* or burden*)<br/>adj1 (work* or job* or occupation*)).mp.</i> | 2,333  |
| 20 | <i>Burnout, Professional/</i>                                                                    | 13,673 |
| 21 | <i>professional burnout.mp.</i>                                                                  | 516    |
| 22 | <i>chronic mental exhaustion.mp.</i>                                                             | 1      |
| 23 | <i>burnout.mp.</i>                                                                               | 20,071 |
| 24 | <i>burned out.mp.</i>                                                                            | 588    |
| 25 | <i>18 or 19 or 20 or 21 or 22 or 23 or 24</i>                                                    | 22,527 |
| 26 | <i>12 and 17 and 25</i>                                                                          | 151    |

## CINAHL

| #   | Query                                  | Limiters/Expanders                       | Last Run Via                                                                                                                              | Results |
|-----|----------------------------------------|------------------------------------------|-------------------------------------------------------------------------------------------------------------------------------------------|---------|
| S17 | <i>S7 AND S12 AND S16</i>              | <i>Search modes -<br/>Boolean/Phrase</i> | <i>Interface - EBSCOhost<br/>Research Databases<br/>Search Screen - Advanced<br/>Search<br/>Database - CINAHL Plus with<br/>Full Text</i> | 92      |
| S16 | <i>S13 OR S14 OR S15</i>               | <i>Search modes -<br/>Boolean/Phrase</i> | <i>Interface - EBSCOhost<br/>Research Databases<br/>Search Screen - Advanced<br/>Search<br/>Database - CINAHL Plus with<br/>Full Text</i> | 12,650  |
| S15 | <i>"burned out"</i>                    | <i>Search modes -<br/>Boolean/Phrase</i> | <i>Interface - EBSCOhost<br/>Research Databases<br/>Search Screen - Advanced<br/>Search<br/>Database - CINAHL Plus with<br/>Full Text</i> | 288     |
| S14 | <i>"chronic mental<br/>exhaustion"</i> | <i>Search modes -<br/>Boolean/Phrase</i> | <i>Interface - EBSCOhost<br/>Research Databases<br/>Search Screen - Advanced<br/>Search</i>                                               | 1       |

|     |                                   |                               |                                                                                                                         |               |
|-----|-----------------------------------|-------------------------------|-------------------------------------------------------------------------------------------------------------------------|---------------|
|     |                                   |                               | Database - CINAHL Plus with Full Text                                                                                   |               |
| S13 | (MH "Burnout, Professional+")     | Search modes - Boolean/Phrase | Interface - EBSCOhost<br>Research Databases<br>Search Screen - Advanced Search<br>Database - CINAHL Plus with Full Text | 12,531        |
| S12 | S8 OR S9 OR S10 OR S11            | Search modes - Boolean/Phrase | Interface - EBSCOhost<br>Research Databases<br>Search Screen - Advanced Search<br>Database - CINAHL Plus with Full Text | 33,293        |
| S11 | "electronic patient record"       | Search modes - Boolean/Phrase | Interface - EBSCOhost<br>Research Databases<br>Search Screen - Advanced Search<br>Database - CINAHL Plus with Full Text | 452           |
| S10 | "electronic medical record"       | Search modes - Boolean/Phrase | Interface - EBSCOhost<br>Research Databases<br>Search Screen - Advanced Search<br>Database - CINAHL Plus with Full Text | 4,903         |
| S9  | (MH "Electronic Order Entry")     | Search modes - Boolean/Phrase | Interface - EBSCOhost<br>Research Databases<br>Search Screen - Advanced Search<br>Database - CINAHL Plus with Full Text | 3,395         |
| S8  | (MH "Electronic Health Records+") | Search modes - Boolean/Phrase | Interface - EBSCOhost<br>Research Databases<br>Search Screen - Advanced Search<br>Database - CINAHL Plus with Full Text | 27,156        |
| S7  | S1 OR S2 OR S3 OR S4 OR S5 OR S6  | Search modes - Boolean/Phrase | Interface - EBSCOhost<br>Research Databases<br>Search Screen - Advanced Search                                          | 1,149,44<br>6 |

|    |                                                                                                            |                               |                                          |         |
|----|------------------------------------------------------------------------------------------------------------|-------------------------------|------------------------------------------|---------|
|    |                                                                                                            |                               | Database - CINAHL Plus with Full Text    |         |
|    |                                                                                                            |                               | Interface - EBSCOhost Research Databases |         |
| S6 | "general practitioner"                                                                                     | Search modes - Boolean/Phrase | Search Screen - Advanced Search          | 6,916   |
|    |                                                                                                            |                               | Database - CINAHL Plus with Full Text    |         |
|    |                                                                                                            |                               | Interface - EBSCOhost Research Databases |         |
| S5 | "doctor"                                                                                                   | Search modes - Boolean/Phrase | Search Screen - Advanced Search          | 27,078  |
|    |                                                                                                            |                               | Database - CINAHL Plus with Full Text    |         |
|    |                                                                                                            |                               | Interface - EBSCOhost Research Databases |         |
| S4 | (MH "Physicians, Family")                                                                                  | Search modes - Boolean/Phrase | Search Screen - Advanced Search          | 21,060  |
|    |                                                                                                            |                               | Database - CINAHL Plus with Full Text    |         |
|    |                                                                                                            |                               | Interface - EBSCOhost Research Databases |         |
| S3 | (MH "Physicians")                                                                                          | Search modes - Boolean/Phrase | Search Screen - Advanced Search          | 64,068  |
|    |                                                                                                            |                               | Database - CINAHL Plus with Full Text    |         |
|    |                                                                                                            |                               | Interface - EBSCOhost Research Databases |         |
| S2 | "physician"                                                                                                | Search modes - Boolean/Phrase | Search Screen - Advanced Search          | 128,596 |
|    |                                                                                                            |                               | Database - CINAHL Plus with Full Text    |         |
|    |                                                                                                            |                               | Interface - EBSCOhost Research Databases |         |
| S1 | ("Nurses+") OR (MH "Nursing Staff, Hospital") OR (MH "Nursing Practice+") OR ((nurse or nurses or nursing) | Search modes - Boolean/Phrase | Search Screen - Advanced Search          | 970,052 |
|    |                                                                                                            |                               | Database - CINAHL Plus with Full Text    |         |

## SCOPUS

*( TITLE-ABS-KEY ( burnout OR "burn\* out" OR "chronic AND mental AND exhaustion" ) AND TITLE-ABS-KEY ( "electronic medical record\*" OR "electronic health record\*" OR "electronic patient record\*" ) AND TITLE-ABS-KEY ( "physician\*" OR "nurse\*" OR "general practitioner\*" OR "doctor\*" OR ( nursing\* ) ) )*
